# Supplementary material for: Paper-Based Vapor Detection of Formaldehyde: Colorimetric Sensing with High Sensitivity
Source: MDPI journal article supplement (doi:10.3390/chemosensors9120335), 2021-11-29
Supplement: s1 [file s1]

Supporting Information

# Paper-Based Vapor Detection of Formaldehyde: Colorimetric Sensing with High Sensitivity

Chenglong Liao <sup>1</sup>, Miao Zhang <sup>1</sup>, Nan Gao <sup>2</sup>, Qingyun Tian <sup>1</sup>, Jiangfan Shi <sup>3</sup>, Shuai Chen <sup>2,\*</sup>, Chuanyi Wang <sup>1</sup> and Ling Zang <sup>3,\*</sup>

<sup>1</sup> School of Environmental Science and Engineering, Shaanxi University of Science and Technology, Xi'an 710021, China; lcl6862@163.com (C.L.); miaozhang1209@163.com (M.Z.); tianqingyun2017@163.com (Q.T.); wangchuanyi@sust.edu.cn (C.W.)

<sup>2</sup> Jiangxi Engineering Laboratory of Waterborne Coatings, Nanchang 330013, China; gaonan2019@163.com

<sup>3</sup> Nano Institute of Utah and Department of Materials Science and Engineering, University of Utah, Salt Lake City, UT 84112, USA; u1320840@utah.edu

\* Correspondence: shuaichen@jxstnu.edu.cn (S.C.); lzang@eng.utah.edu (L.Z.); +1-801-587-1551 (L.Z.); Fax: +1-801-581-481 (L.Z.)

Comparison of colorimetric response of sensor strips fabricated from different paper towels:

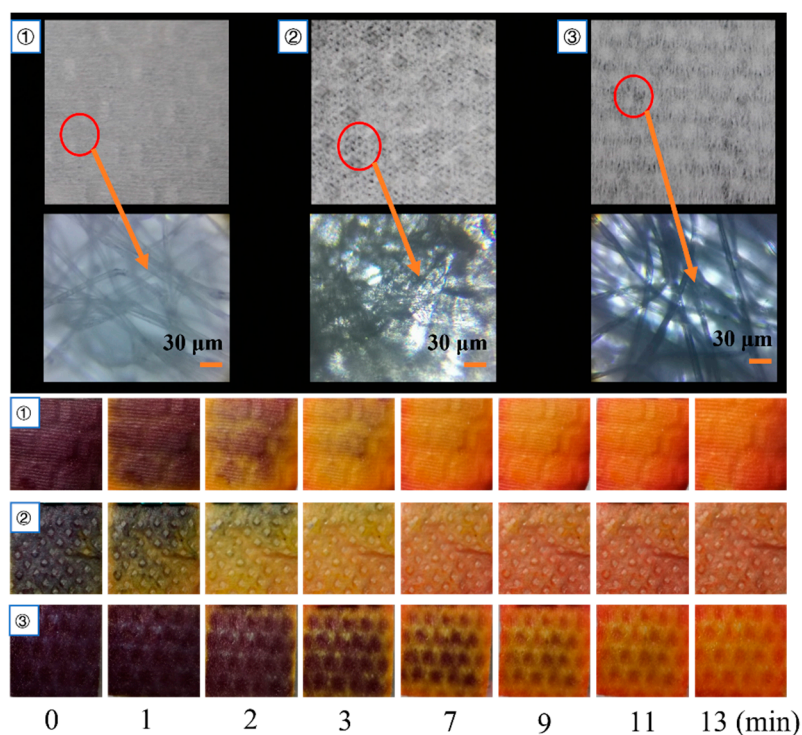

**Figure S1.** (Top two panels) photos of the three types of paper towels, No.1, No.2, and No.3. Also shown are the optical microscope photographs of the paper towels, revealing clearly the cellulose fibril network. (Lower three panels) The color response of the sensor strips made from the three paper towels coated with  $(\text{NH}_4\text{OH})_2 \cdot \text{H}_2\text{SO}_4$  and pH indicators when exposed to FA vapor (10 ppm). The initial pH value of the immersion solution used for preparing the sensor strips was  $4.7 \pm 0.1$ , and all measurements were performed, at 25 °C and 45% RH.

### Selection of hydroxylamine acid salts:

**Table S1.** Comparison of five hydroxylamine acidic salts and the pH change upon reaction with FA in aqueous solutions.

| Hydroxylamine acid salt                       |       |                                      | V <sub>water</sub><br>(mL) | H <sup>+</sup> concentration (mol/L,<br>entirely hydrolytic) | Initial pH                           |          | FA<br>(mmol) | pH<br>after<br>reaction |
|-----------------------------------------------|-------|--------------------------------------|----------------------------|--------------------------------------------------------------|--------------------------------------|----------|--------------|-------------------------|
| Structure                                     | M (g) | M <sub>H<sup>+</sup></sub><br>(mmol) |                            |                                                              | Theoretical<br>(entirely hydrolytic) | Measured |              |                         |
| <chem>N-O</chem><br><chem>Cl</chem>           | 0.139 | 2                                    | 20                         | 0.1                                                          | 1                                    | 2.30     | 0.151        | 1.07                    |
| <chem>O=S(=O)(O)N-O</chem><br><chem>Cl</chem> | 0.164 | 2                                    | 20                         | 0.1                                                          | 1                                    | 3.97     | 0.151        | 1.32                    |
| <chem>O=S(=O)(O)N</chem><br><chem>Cl</chem>   | 0.226 | 2                                    | 20                         | 0.1                                                          | 1                                    | 1.21     | 0.151        | 1.03                    |
| <chem>CC(C)(C)ON</chem><br><chem>Cl</chem>    | 0.251 | 2                                    | 20                         | 0.1                                                          | 1                                    | 2.45     | 0.151        | 1.21                    |
| <chem>OC(=O)CNC</chem><br><chem>Cl</chem>     | 0.437 | 2                                    | 20                         | 0.1                                                          | 1                                    | 2.95     | 0.323        | 2.78                    |

### The stability of the initial color of the sensor strip under different humidity:

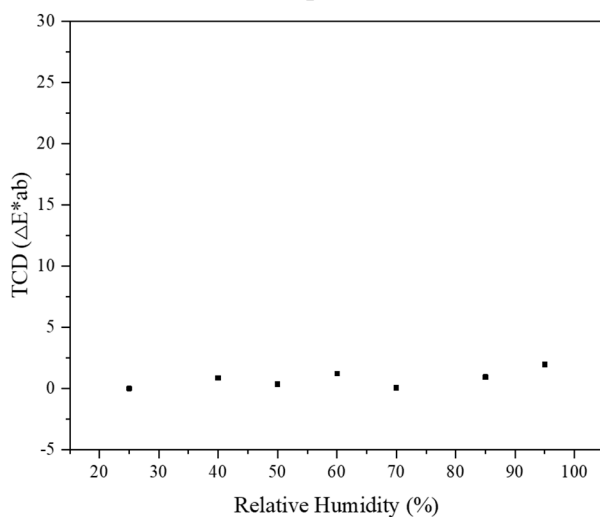

**Figure S2.** Colorimetric response ( $\Delta E^*ab$ ) of the sensor strip upon exposure to different humidity levels (25-95%) in the absence of FA.
